# Supplementary material
Source: PubMed Central journal article supplement (PMC9271638)
Supplement: NIHMS1801164-supplement-8.pdf [file NIHMS1801164-supplement-8.pdf]

## **Supplemental Information**

### **Localization of a TORC1-eIF4F translation complex during CD8<sup>+</sup> T cell activation drives divergent cell fate**

Swantje Liedmann, Xueyan Liu, Clifford S. Guy, Jeremy Chase Crawford, Diego A. Rodriguez, Duygu Kuzuoğlu-Öztürk, Ao Guo, Katherine C. Verbist, Jamshid Temirov, Mark J. Chen, Davide Ruggero, Hui Zhang, Paul G. Thomas, Douglas R. Green

**Figure S1**

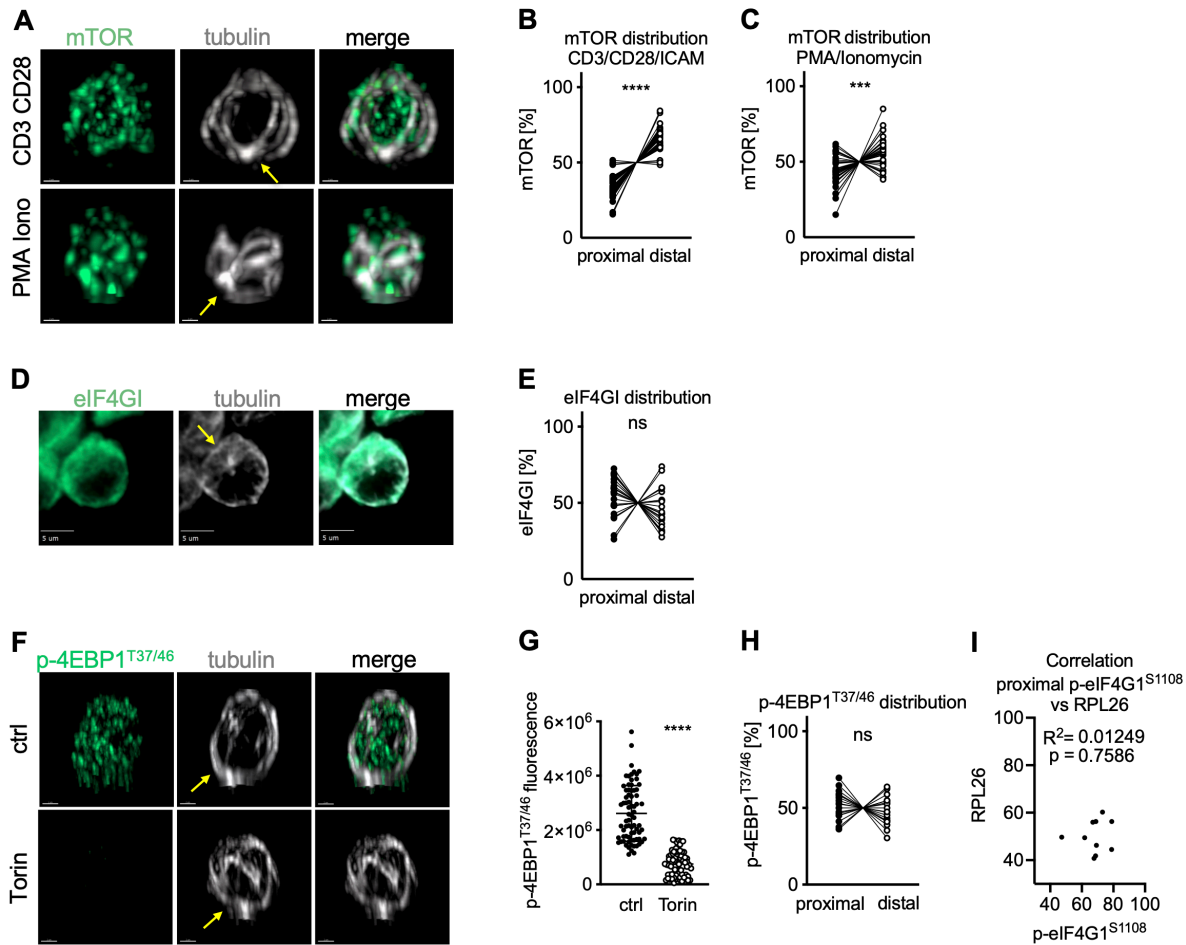

**Figure S1. TORC1 signaling is localized at the proximal pole of activated, undivided OT-I CD8<sup>+</sup> T cells regulating asymmetric c-Myc synthesis. Related to Figure 1.**

(A) Representative images of undivided OT-I CD8<sup>+</sup> T cells activated on slides coated with anti-CD3, anti-CD28, and ICAM1 or with PMA plus Ionomycin for 2 h. Scale bar: 2  $\mu$ m. (B, C) Quantification of the distribution of mTOR within the cell. Each dot represents signal in the proximal or distal half of a cell. A line connects data points from two halves of the same cell. (D) Representative images of undivided OT-I CD8<sup>+</sup> T cells activated on peptide-pulsed APCs. Scale bar: 5  $\mu$ m. (E) Quantification of the distribution of eIF4GI signal within the cell. Each dot represents signal in the proximal or distal half of a cell. A line connects data points from two halves of the same cell. (F) Representative images of undivided OT-I CD8<sup>+</sup> T cells activated on antibody-coated slides as in (A) for 2 h and treated with Torin for the last hour of activation. Scale bar: 5  $\mu$ m. (G) Quantification of sum fluorescence intensity of p-4EBP1<sup>T37/46</sup>. Each dot represents one cell; mean  $\pm$  SD. (H) Quantification of the distribution of p-4EBP1<sup>T37/46</sup> signal within the cell. Each dot represents signal in the proximal or distal half of a cell. A line connects data points from two halves of the same cell. (I) Relation between proportion of proximal p-eIF4GI<sup>S1108</sup> and proximal RPL26 within the same cell by Poisson regression. Each dot represents one cell. Arrows indicate MTOCs. Compiled from two (G, H) or three independent experiments (B, C, E). Significance was calculated with paired (B, C, E, H) or unpaired (G) *Student's t-test*; \*\*\* $p < 0.001$ , \*\*\*\* $p < 0.0001$ , ns=not statistically significant.

**Figure S2**

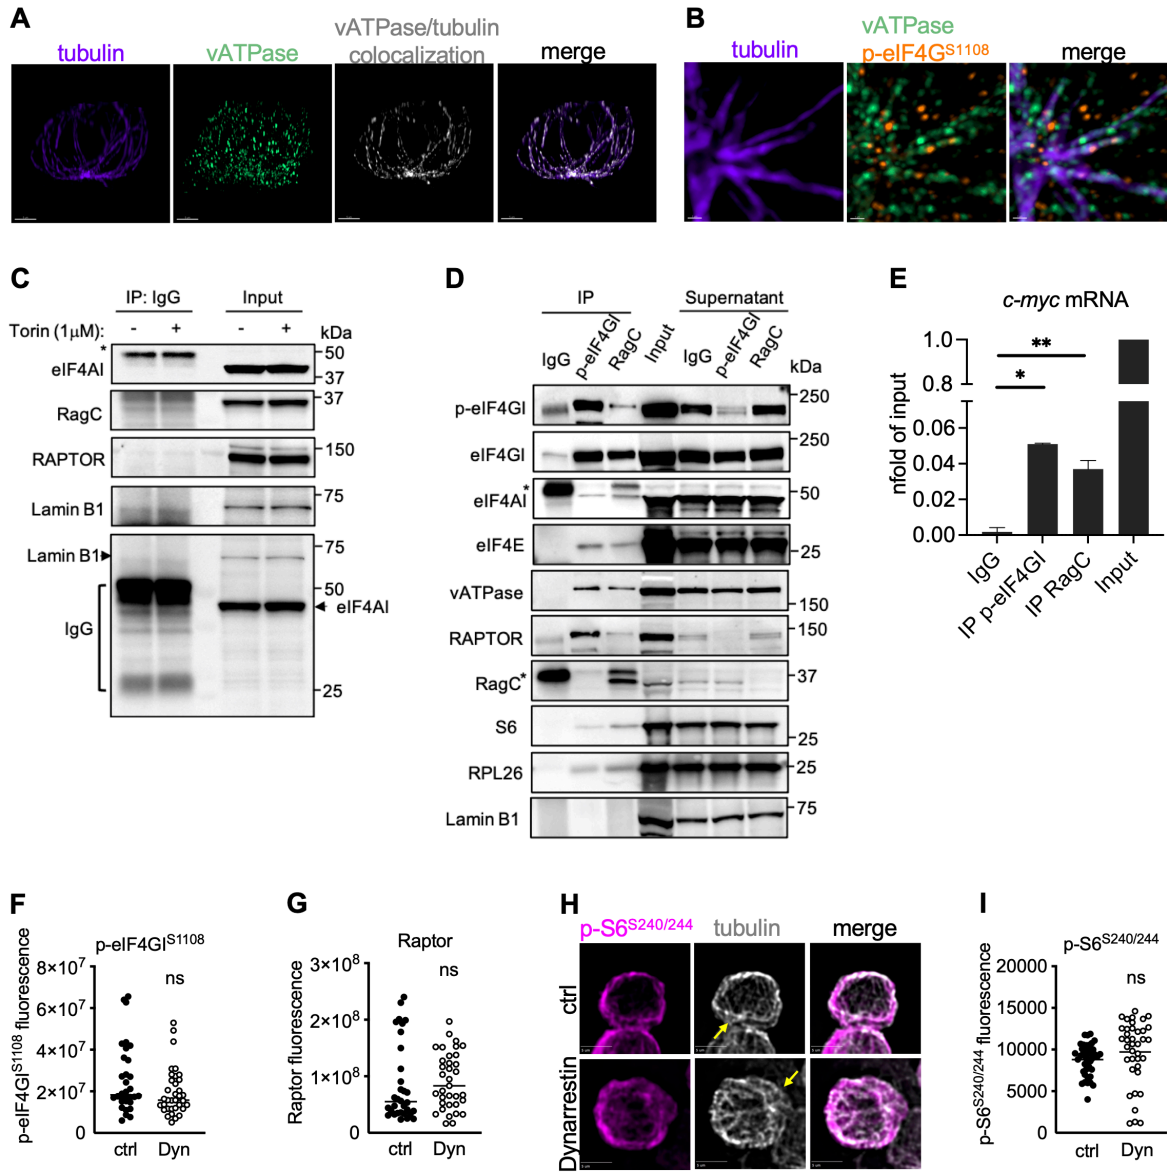

**Figure S2. Dynein-dependent vesicular transport mediates polarization of the TORC1-eIF4F complex towards the proximal pole of activated, undivided OT-I CD8<sup>+</sup> T cells. Related to Figure 2.**

OT-I CD8<sup>+</sup> T cells activated on antibody-coated plates as in Figure S1A (A, B) or peptide-pulsed APCs (C-I). **(A)** Association of vATPase<sup>+</sup> vesicular structures along microtubules in visualized by expansion microscopy. Scale bar: 5  $\mu$ m. **(B)** Association of p-eIF4G<sup>S1108</sup> with vATPase<sup>+</sup> vesicular structures along microtubules visualized by expansion microscopy. Scale bar: 1  $\mu$ m. **(C)** Input control and Co-Immunoprecipitation of IgG in OT-I CD8<sup>+</sup> T cells activated on APCs for 24 h and treated with Torin for the last hour of activation. Corresponding controls to Fig. 2D. **(D, E)** Co-Immunoprecipitation of p-eIF4G<sup>S1108</sup> and RagC in OT-I CD8<sup>+</sup> T cells activated on APCs for 24 h. Representative Western blot **(D)** and detection of *c-myc* mRNA in IP fractions by qPCR **(E)**. An asterisk indicates unspecific antibody binding. **(F, G)** Quantification of sum fluorescence intensity of p-eIF4G<sup>S1108</sup> **(F)** and Raptor **(G)**. Each dot represents one cell; mean +/- SD. Corresponding to Fig. 2F. **(H)** Representative images of undivided OT-I CD8<sup>+</sup> T cells activated on peptide-pulsed APCs for 24 h and treated with Dynarrestin for the last hour of activation. Scale bar: 5  $\mu$ m. **(I)** Quantification of sum fluorescence intensity of p-S6<sup>S240/244</sup>. Each dot represents one cell; mean +/- SD. Arrows mark MTOCs. Compiled from two **(E)** or three independent experiments **(F, G, I)**. Significance was calculated with unpaired **(E-G, I)** *Student's t-test*. \*p<0.05, \*\*p<0.01, ns=not statistically significant.

**Figure S3**

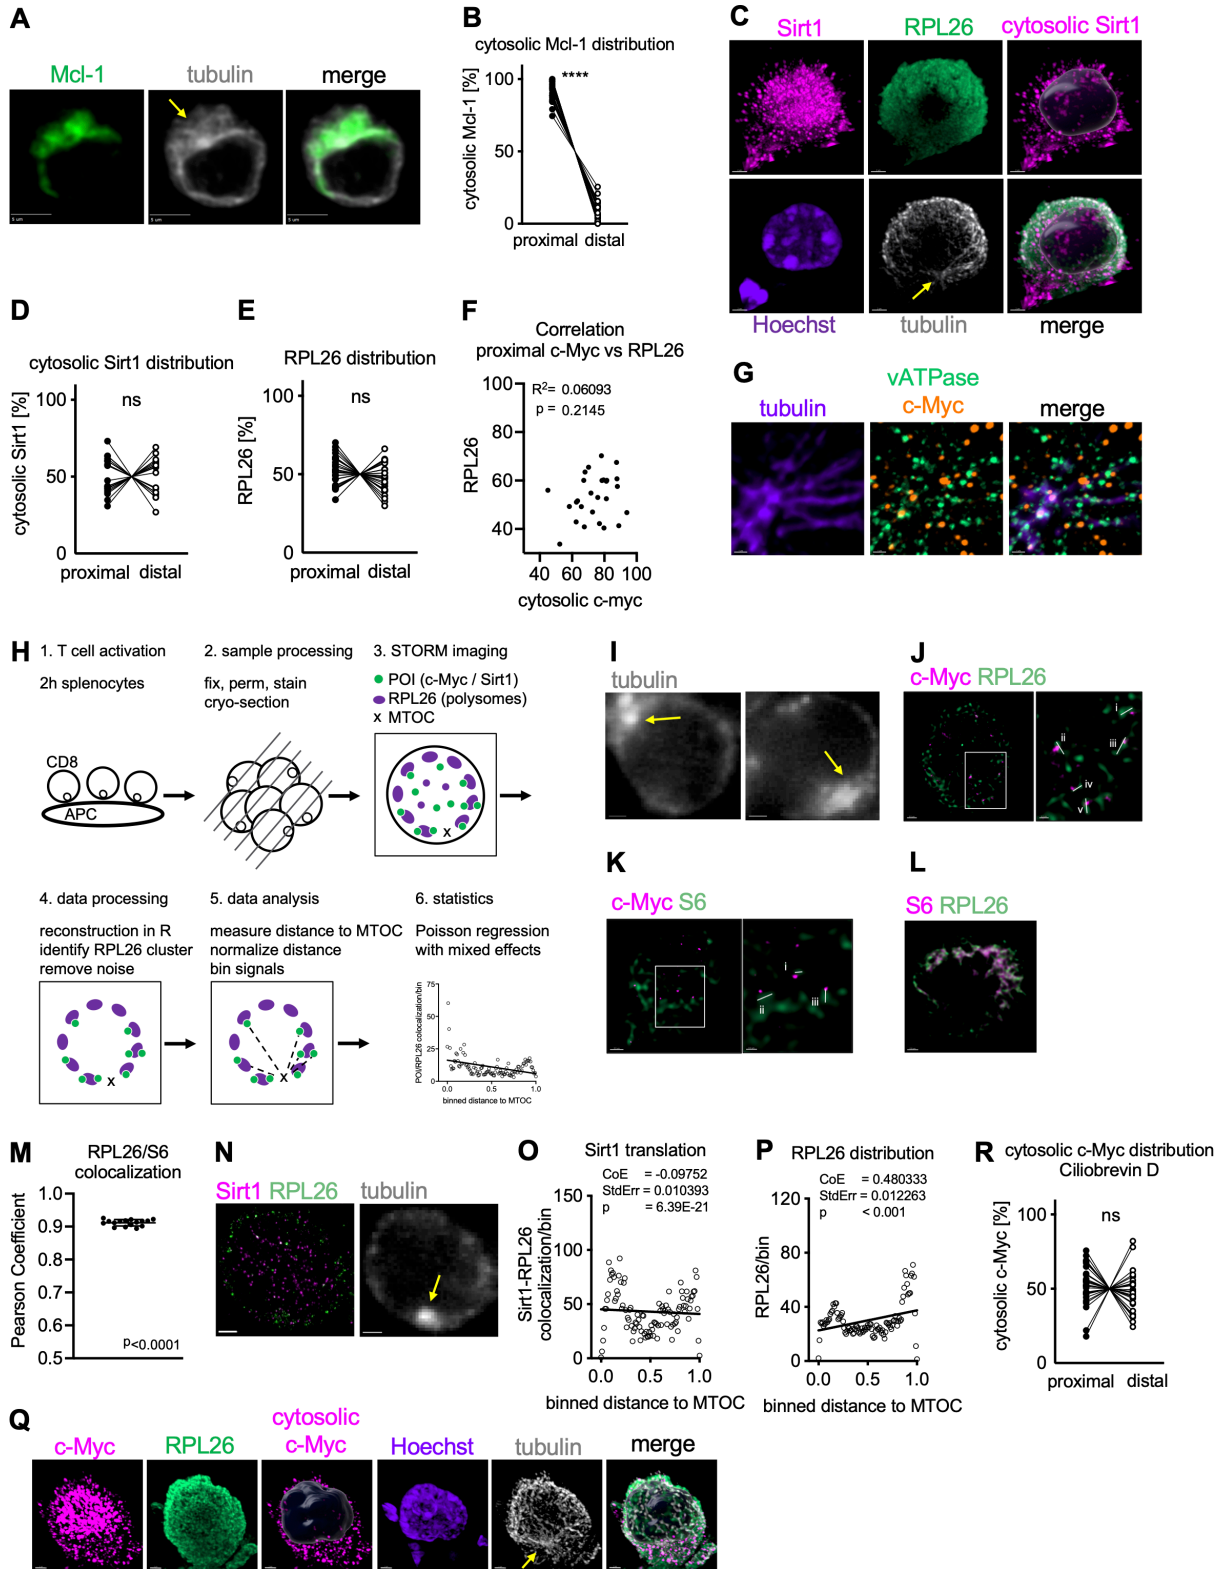

**Figure S3. C-Myc synthesis localizes to the proximal pole of activated OT-I CD8<sup>+</sup> T cells prior to the first division. Related to Figure 3.**

(A) Representative images of undivided OT-I CD8<sup>+</sup> T cells activated on peptide-pulsed APCs. Scale bar: 5  $\mu\text{m}$ . (B) Quantification of the distribution of Mcl-1 signal within the cell. Each dot represents signal in the proximal or distal half of a cell. A line connects data points from two halves of the same cell. (C-E) Spatial distribution of cytosolic Sirt1 in undivided OT-I CD8<sup>+</sup> T cells activated on peptide-pulsed APCs using SoRa imaging. Representative image, cytosolic Sirt1 is visualized by masking nuclear c-Myc based on Hoechst (C). Scale bar: 2  $\mu\text{m}$ . Quantification of the distribution of cytosolic Sirt1 (D) and total RPL26 (E) within the cell. Each dot represents signal in the proximal or distal half of a cell. A line connects data points from two halves of the same cell. (F) Relation between proportion of proximal c-Myc and proximal RPL26 within the same cell by Poisson regression. Each dot represents one cell. (G) Association of c-Myc with vATPase<sup>+</sup> vesicular structures along microtubules visualized by expansion microscopy. Scale bar: 1  $\mu\text{m}$ . (H) Experimental and analytical approaches to assess spatial distribution of c-Myc synthesis in undivided OT-I CD8<sup>+</sup> T cells by STORM. (I) Tubulin staining corresponding to STORM data in Fig. 3C (left) and 3D (right). (J, K) Polysomes were identified in STED images by visual inspection based on size ((J) RPL26: i, 0.32  $\mu\text{m}$ ; ii, 0.33  $\mu\text{m}$ ; iii, 0.41  $\mu\text{m}$ ; iv, 0.24  $\mu\text{m}$ ; v, 0.33  $\mu\text{m}$ ; (K) S6: i, 0.18  $\mu\text{m}$ ; ii, 0.27  $\mu\text{m}$ ; iii, 0.23  $\mu\text{m}$ ) and shape. Scale bars: 0.5  $\mu\text{m}$  wide, 0.2  $\mu\text{m}$  zoom. (L) Representative image of RPL26/S6 colocalization analysis using STED imaging. (M) Quantification of RPL26/S6 colocalization using Pearson coefficient. (N-P) Spatial distribution of Sirt1 synthesis and RPL26 in undivided OT-I CD8<sup>+</sup> T cells activated on peptide pulsed APCs by STORM. Representative image (N) and relation between number of Sirt1/RPL26 co-localization events (O) or RPL26 (P) cluster and distance towards the MTOC by Poisson regression. Each dot represents the average number of co-localization events across all analyzed cells. (Q, R) Spatial distribution of cytosolic c-Myc in undivided OT-I CD8<sup>+</sup> T cells activated on peptide-pulsed APCs and treated with Ciliobrevin D for the last hour of activation. Representative SoRa image, cytosolic c-Myc is visualized by masking nuclear c-Myc based on Hoechst (Q). Scale bar: 2  $\mu\text{m}$ . Quantification of the distribution of cytosolic c-Myc within the cell (R). Each dot represents signal in the proximal or distal half of a cell. A line connects data points from two halves of the same cell. Arrows indicate MTOCs. Compiled from two (M, O, P) or three (B, D-F, R) independent experiments. Significance was calculated with Wilcoxon signed-rank test against 0 (M) or paired (B, D, E, R) *Student's t-test*; \*\*\*\* $p < 0.0001$ , ns=not statistically significant.

**Figure S4**

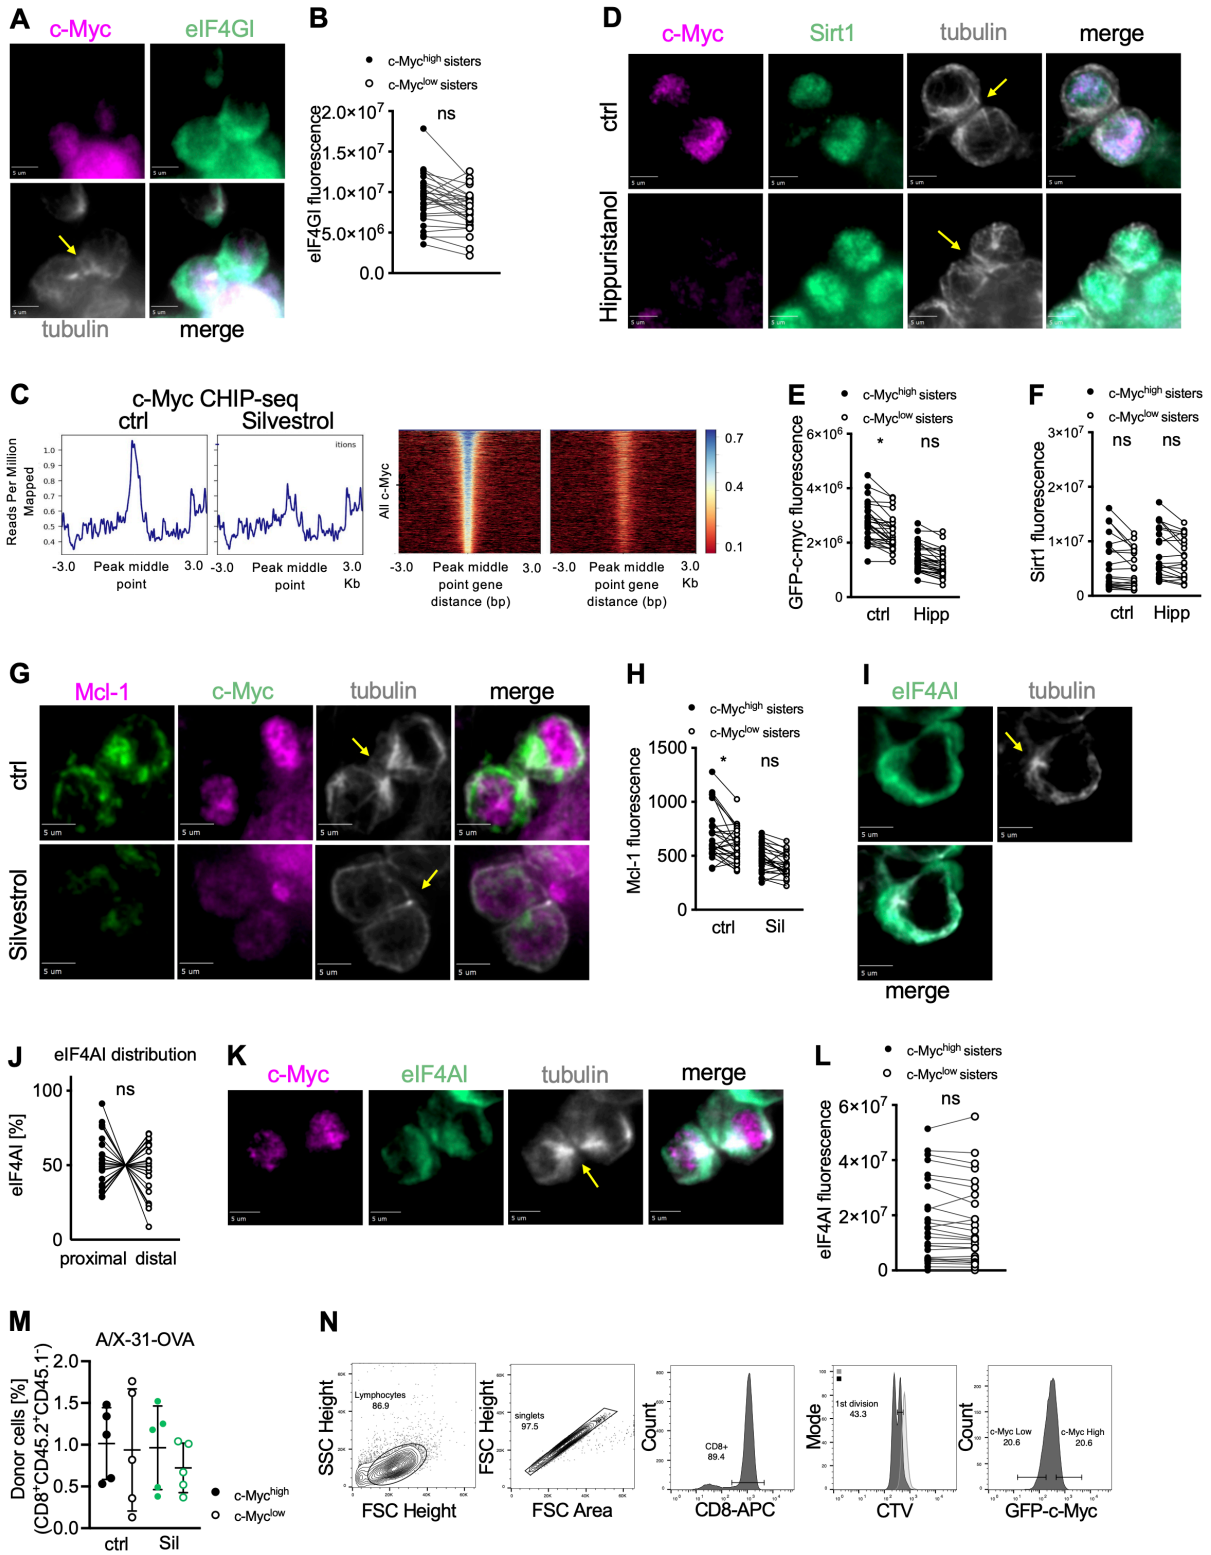

**Figure S4. Inhibition of eIF4A at the time of first division promotes memory-like function. Related to Figure 4.**

(A) Representative images of conjoined sister OT-I GFP-c-Myc CD8<sup>+</sup> T cells activated for 28 h on peptide-pulsed APCs. Scale bar: 5  $\mu$ m. (B) Quantification of sum fluorescence intensity of eIF4G1 in conjoined sister cells. Each dot represents one cell, data points of sister cells are connected by a line. (C) CHIP-seq analysis of c-Myc. Average plots (left) and heatmaps (right). (D) Representative images of conjoined daughter OT-I GFP-c-Myc CD8<sup>+</sup> T cells activated for 28 h on peptide-pulsed APCs and treated with Hippuristanol for the last hour of activation. Scale bar: 5  $\mu$ m. (E, F) Quantification of sum fluorescence intensity of GFP-c-Myc (E) or Sirt1 (F) in conjoined sister cells. Each dot represents one cell, data points of sister cells are connected by a line. (G) Representative images of conjoined daughter OT-I GFP-c-Myc CD8<sup>+</sup> T cells activated for 28 h on peptide-pulsed APCs and treated with Silvestrol for the last hour of activation. Scale bar: 5  $\mu$ m. (H) Quantification of mean fluorescence intensity of Mcl-1 in conjoined sister cells. Each dot represents one cell, data points of sister cells are connected by a line. (I) Representative images of undivided OT-I CD8<sup>+</sup> T cells activated on APCs. Scale bar: 5  $\mu$ m. (J) Quantification of the distribution of eIF4A1 signal within the cell. Each dot represents signal in the proximal or distal half of a cell. A line connects data points from two halves of the same cell. (K) Representative images of conjoined daughter OT-I GFP-c-Myc CD8<sup>+</sup> T cells activated for 28 h on peptide-pulsed APCs. Scale bar: 5  $\mu$ m. (L) Quantification of sum fluorescence intensity of eIF4A1 in conjoined sister cells. Each dot represents one cell, data points of sister cells are connected by a line. (M) Frequency of OT-I GFP-c-Myc CD8<sup>+</sup> donor cells (congenic wild type recipients) in peripheral blood on day 9 after A/X-31-OVA infection. Each dot represents a recipient animal, n=5; mean +/- SD. (N) Sorting strategy corresponding to Fig. 4H, I. Arrows indicate MTOCs and tubulin bridges. Compiled from two (F) or three (B, E, H, J, L) independent experiments. Significance was calculated with paired *Student's t-test* (B, J, L) or ANOVA (E, F, H); \*p<0.05, ns=not statistically significant.



**Figure S5**

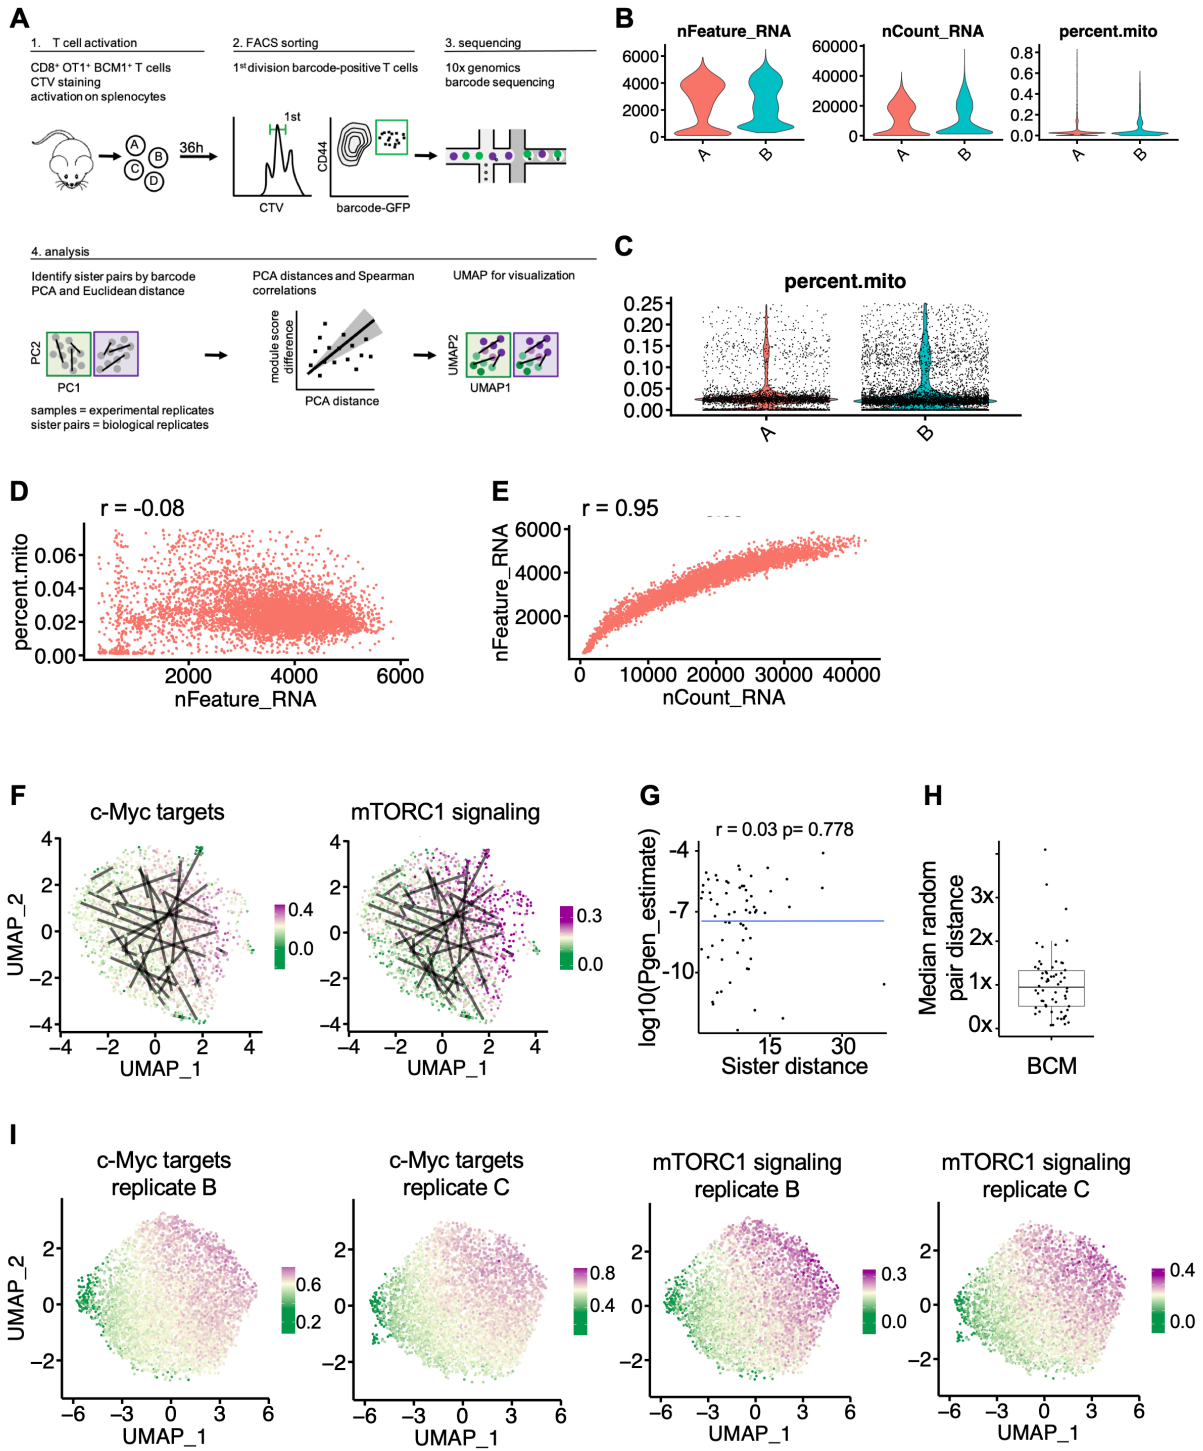

**Figure S5. Transcriptional heterogeneity in sister cells is established as early as the first division. Related to Figure 5.**

(A) Experimental and analytical approaches to assess transcriptional heterogeneity of first division OT-I BCM CD8<sup>+</sup> T sister cells. (B) Violin plots representing standard quality control metrics of single cells from two experimental barcode model replicates before filtering out problematic cells. nFeature = the number of genes detected, nCount = the number of unique RNA molecules detected, and percent.mito = the ratio of expression owed to mitochondrial genes versus all other genes, in individual cells. (C) Violin plots of the same replicates in (B), with values above 0.25 excluded. Dots represent individual cells before filtering out problematic cells. (D, E) After filtering, cells exhibit expected relationships between standard quality control metrics, as assessed by Pearson correlations. (F) UMAP plots representing single-cell gene expression obtained from barcode experiment replicate B, as described in Fig. 5A. Lines connect putative sister cells. Color gradient corresponds to specific gene set modules scores, where the gradient midpoint (light yellow) is set to the median module score. (G) Dot plot depicting the lack of a significant Spearman correlation between pairwise Euclidean PCA distance and barcode-specific probabilities of generation ( $P_{\text{gen}}$ ) for putative sister cell pairs. (H) Visualization of sister pair transcriptional differences contextualized by the transcriptional heterogeneity within the entire experiment. Y-axis represents cell-cell PCA distances relative to the median distance between randomly selected pairs. Each point represents a putative sister-cell pair. A value of zero represents identical sister pairs, and a value of 1 represents the median distance between randomly selected pairs. (I) UMAP plots representing single-cell gene expression of first-division T cells obtained from replicates B and C of three independent in vivo experiments, otherwise presented as described in (F). Additional replicates are presented in Fig. 5.
